# Supplementary material for: Dark conditions enhance aluminum tolerance in several rice cultivars via multiple modulations of membrane sterols
Source: PubMed Central journal article supplement (PMC5853495; doi:10.1093/jxb/erx414), 2017-12-23
Supplement: erx414_suppl_supplementary_tables_s1-s2_and_figure_s1.pdf [file erx414_suppl_supplementary_tables_s1-s2_and_figure_s1.pdf]

### Supplementary Table S1

Proportional ratios of minor sterol species under different conditions  
(calculated from data shown in Figure 3)

|           |                  |                  | Isofucosterol | 24-Methylene<br>cholesterol |
|-----------|------------------|------------------|---------------|-----------------------------|
| Al/Cont   | L                | R <sub>132</sub> | 0.78          | 0.75                        |
|           |                  | Ko               | 0.68          | 0.73                        |
|           | DMG              | R <sub>132</sub> | 1.10          | 1.09                        |
|           |                  | Ko               | 1.25          | 1.25                        |
| AlDMG/AlL | R <sub>132</sub> | 1.51             | 2.02          |                             |
|           | Ko               | 2.11             | 2.42          |                             |

- Al/Cont: proportion of each sterol species to total sterols in Al/that in control
- AlDMG/AlL: proportion of each sterol species to total sterols in Al under DMG/that in Al under L

### Supplementary Table S2

Net root elongation of 5-day-old seedlings of rice cultivars in different illumination and medium conditions during 24 h of treatment (mean of 7-10 replicates  $\pm$  standard error). Number in parentheses is relative root elongation (net elongation in treatment relative to that under light conditions in the same treatment). M, G: 1 mM mevalonate and 1 mM glucose in the medium.

| Cultivar | Treatment | Net root elongation ( cm/24h ) |                             |                             |
|----------|-----------|--------------------------------|-----------------------------|-----------------------------|
|          |           | Light (L)<br>(L=100)           | Dark (D)<br>(D/L)           | Dark, M, G (DMG)<br>(DMG/L) |
| R132     | Control   | 1.84 $\pm$ 0.037<br>(100)      | 2.24 $\pm$ 0.048<br>(121.7) | 1.96 $\pm$ 0.070<br>(106.5) |
|          | AI        | 1.31 $\pm$ 0.032<br>(100)      | 1.47 $\pm$ 0.086<br>(112.2) | 1.51 $\pm$ 0.045<br>(115.3) |
| Ko       | Control   | 1.78 $\pm$ 0.051<br>(100)      | 2.26 $\pm$ 0.133<br>(127.0) | 1.93 $\pm$ 0.175<br>(108.4) |
|          | AI        | 0.80 $\pm$ 0.052<br>(100)      | 1.27 $\pm$ 0.150<br>(158.8) | 1.32 $\pm$ 0.230<br>(165.0) |
| Ka       | Control   | 2.93 $\pm$ 0.060<br>(100)      | 3.14 $\pm$ 0.087<br>(107.2) | 2.98 $\pm$ 0.045<br>(101.7) |
|          | AI        | 0.92 $\pm$ 0.034<br>(100)      | 0.94 $\pm$ 0.046<br>(102.2) | 1.05 $\pm$ 0.030<br>(114.1) |

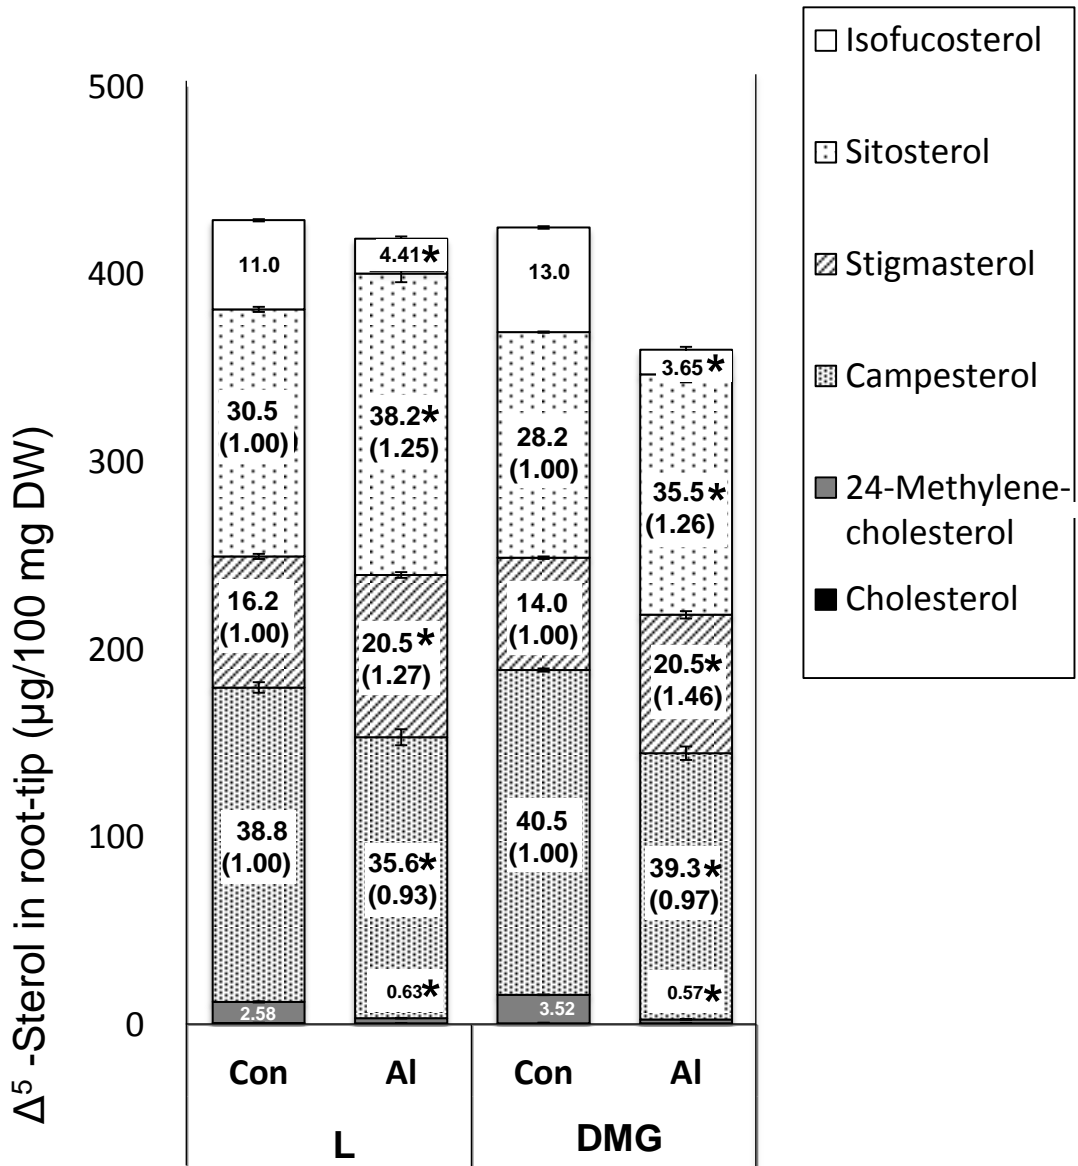

Supplementary Fig. S1

Sterol composition in 1-cm root-tip portion of rice cv. Ka under different illumination conditions. Length of each sterol bar shows concentration of sterols ( $\mu\text{g}/100 \text{ mg DW}$ ); number within each sterol bar shows proportion of each sterol species out of total sterols in the same treatment; number in parentheses shows ratio of proportion of each sterol species in the control to that in the Al treatment (%). As the composition of cholesterol was too low, it hides below that of 24-methylene cholesterol. Five-day-old rice seedlings were treated for 24 h with  $0.2 \text{ mM CaCl}_2$  in the presence or absence of  $10 \mu\text{M AlCl}_3$  (pH 4.9) under light conditions (L) or in the dark conditions with  $1 \text{ mM mevalonate}$  and  $1 \text{ mM glucose}$  (DMG). Values are means of three independent replicates  $\pm$  standard error. Asterisk in the right side of the proportion of each sterol species indicates significant difference ( $P < 0.01$ ; t-test) between control and Al treatment under the same illumination conditions.
